# Supplementary material for: Does self reflection and insight correlate with academic performance in medical students?
Source: PubMed Central journal article supplement (PMC3765283; doi:10.1186/1472-6920-13-113), 2013-08-23
Supplement: 1472-6920-13-113-S1.pdf [file 1472-6920-13-113-S1.pdf]

Appendix 1: The Self reflection and insight scale (SRIS)

| <b>Self reflection and insight questionnaire: subjects respond on a likert scale as follows: “Strongly agree, agree, neutral, disagree, strongly disagree”</b> |                                                                                                  |
|----------------------------------------------------------------------------------------------------------------------------------------------------------------|--------------------------------------------------------------------------------------------------|
| 1                                                                                                                                                              | I don't often think about my thoughts <sup>1</sup>                                               |
| 2                                                                                                                                                              | I am not really interested in analyzing my behaviour <sup>2</sup>                                |
| 3                                                                                                                                                              | I am usually aware of my thoughts <sup>3</sup>                                                   |
| 4                                                                                                                                                              | I am often confused about the way that I really feel about things <sup>3</sup>                   |
| 5                                                                                                                                                              | It is important for me to evaluate the things that I do <sup>2</sup>                             |
| 6                                                                                                                                                              | I usually have a very clear idea about why I have behaved in a certain way <sup>3</sup>          |
| 7                                                                                                                                                              | I am very interested in examining what I think about <sup>2</sup>                                |
| 8                                                                                                                                                              | I rarely spend time in self reflection <sup>1</sup>                                              |
| 9                                                                                                                                                              | I'm often aware that I am having a feeling, but I often don't quite know what it is <sup>3</sup> |
| 10                                                                                                                                                             | I frequently examine my feelings <sup>1</sup>                                                    |
| 11                                                                                                                                                             | My behaviour often puzzles me <sup>3</sup>                                                       |
| 12                                                                                                                                                             | It is important to me to try to understand what my feelings mean <sup>2</sup>                    |
| 13                                                                                                                                                             | I don't really think about why I behave in the way that I do <sup>1</sup>                        |
| 14                                                                                                                                                             | Thinking about my thoughts make me more confused <sup>3</sup>                                    |
| 15                                                                                                                                                             | I have a definite need to understand the way my mind works <sup>2</sup>                          |
| 16                                                                                                                                                             | I frequently take time to reflect on my thoughts <sup>1</sup>                                    |
| 17                                                                                                                                                             | Often I find it difficult to make sense of the way I feel about things <sup>3</sup>              |
| 18                                                                                                                                                             | It is important to me to be able to understand how my thoughts arise <sup>2</sup>                |
| 19                                                                                                                                                             | I often think about the way I feel about things <sup>1</sup>                                     |
| 20                                                                                                                                                             | I usually know why I feel the way I do <sup>3</sup>                                              |

Items 1,2,4,8,11,13,14 and 17 are reversed.

1. Component a) Engaging in self-reflection

2. Component b) Need for self-reflection

3. Component c) Insight
